# Supplementary material for: MicroRNA-148a induces apoptosis and prevents angiogenesis with bevacizumab in colon cancer through direct inhibition of ROCK1/c-Met via HIF-1α under hypoxia
Source: PubMed Central journal article supplement (PMC9467409; doi:10.18632/aging.204243), 2022-08-22
Supplement: aging-14-204243-s001.pdf [file aging-14-204243-s001.pdf]

## SUPPLEMENTARY FIGURES

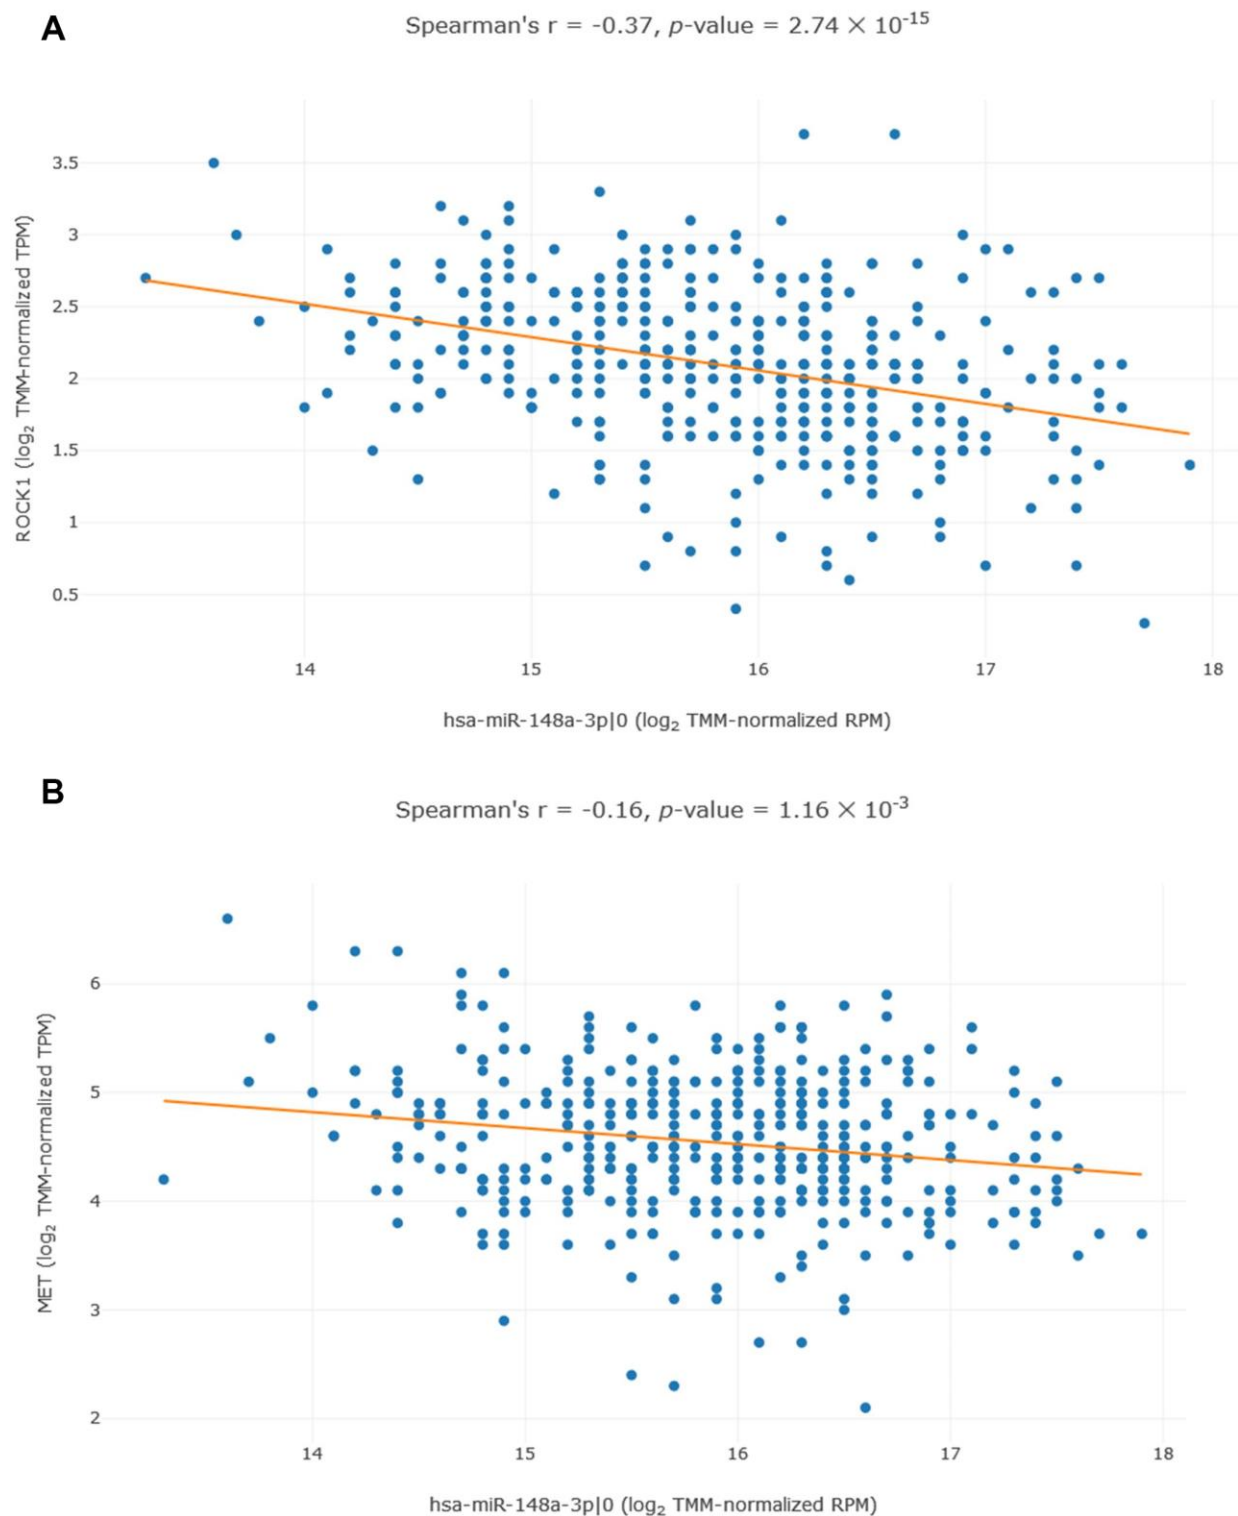

**Supplementary Figure 1.** Two candidate genes, *ROCK1* and *c-Met*, were selected from the isomiRTar portal. (A) *miR-148a* is significantly anti-correlated with *ROCK1* (B) *miR-148a* slightly anti-correlated with *c-Met*.

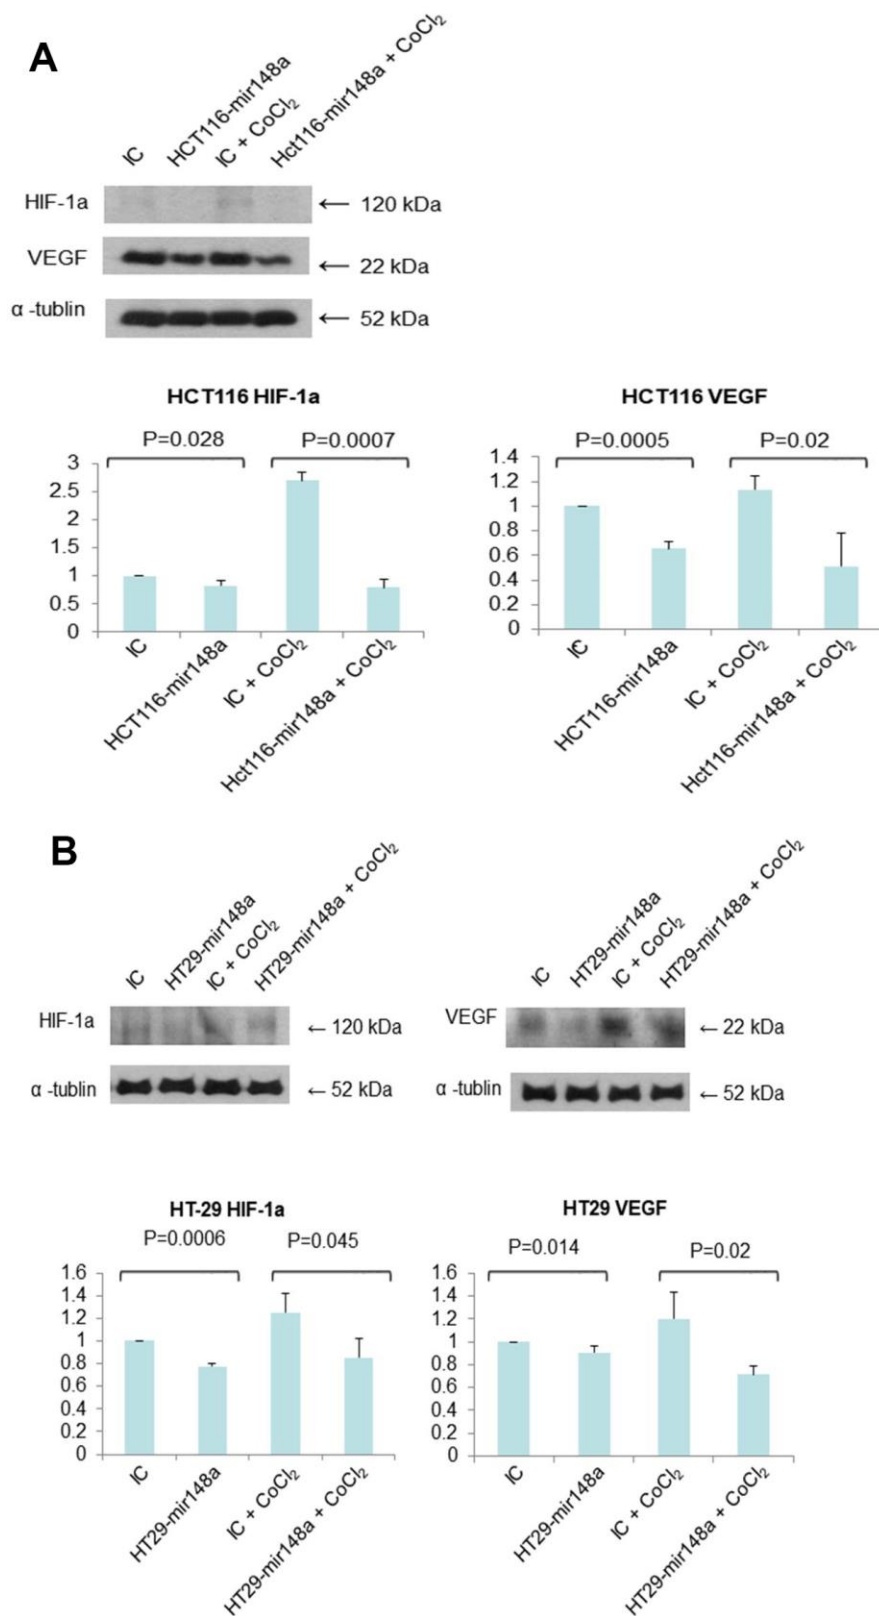

**Supplementary Figure 2. *miR-148a* suppressed the secretions of VEGF and HIF-1 $\alpha$  under hypoxic condition (created by CoCl<sub>2</sub>).** (A) *miR-148a* could significantly inhibit the expressions of *HIF-1 $\alpha$*  and *VEGF* in HCT116 (non-hypoxic:  $P = 0.028$  and  $0.0005$ ; hypoxic:  $P = 0.0007$  and  $0.02$ , respectively). (B) *miR-148a* could significantly inhibit the expressions of *HIF-1 $\alpha$*  and *VEGF* in HT29 (non-hypoxic:  $P = 0.0006$  and  $0.0014$ ; hypoxic:  $P = 0.045$  and  $0.02$ , respectively).

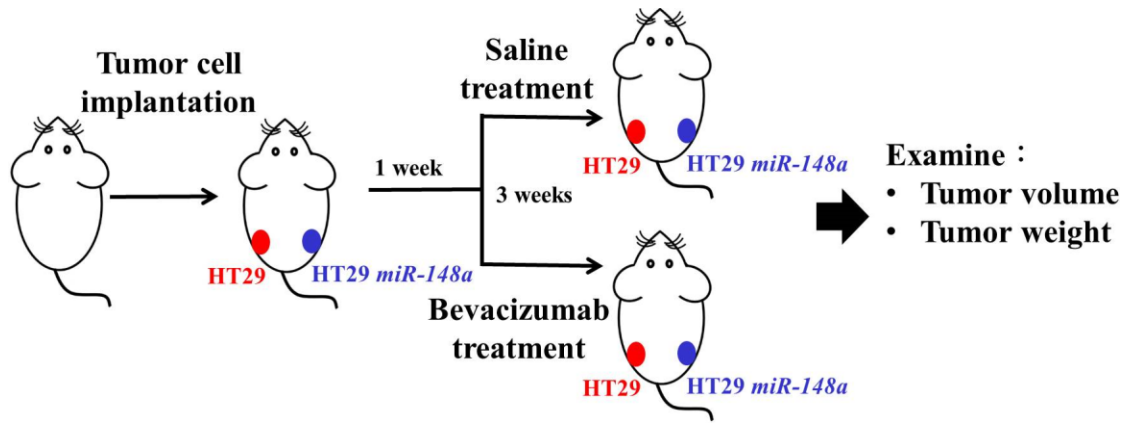

**Supplementary Figure 3. The process of the animal study.** At 8 weeks of age, the mice subcutaneously injected with *miR-148a* overexpression and NC clones (HT29 cells) with scrambled pCDH-NC for tumor growth (red circle: NC; blue circle: *miR-148a* overexpression). One week after implantation, the mice were assigned into two groups—saline only or bevacizumab. The mice received an intraperitoneal injection of bevacizumab (2.5 mg/kg) or an equal volume of saline twice per week. After the tumor-bearing mice were sacrificed at 3 weeks after tumor cell seeding, tumor burdens were analyzed.

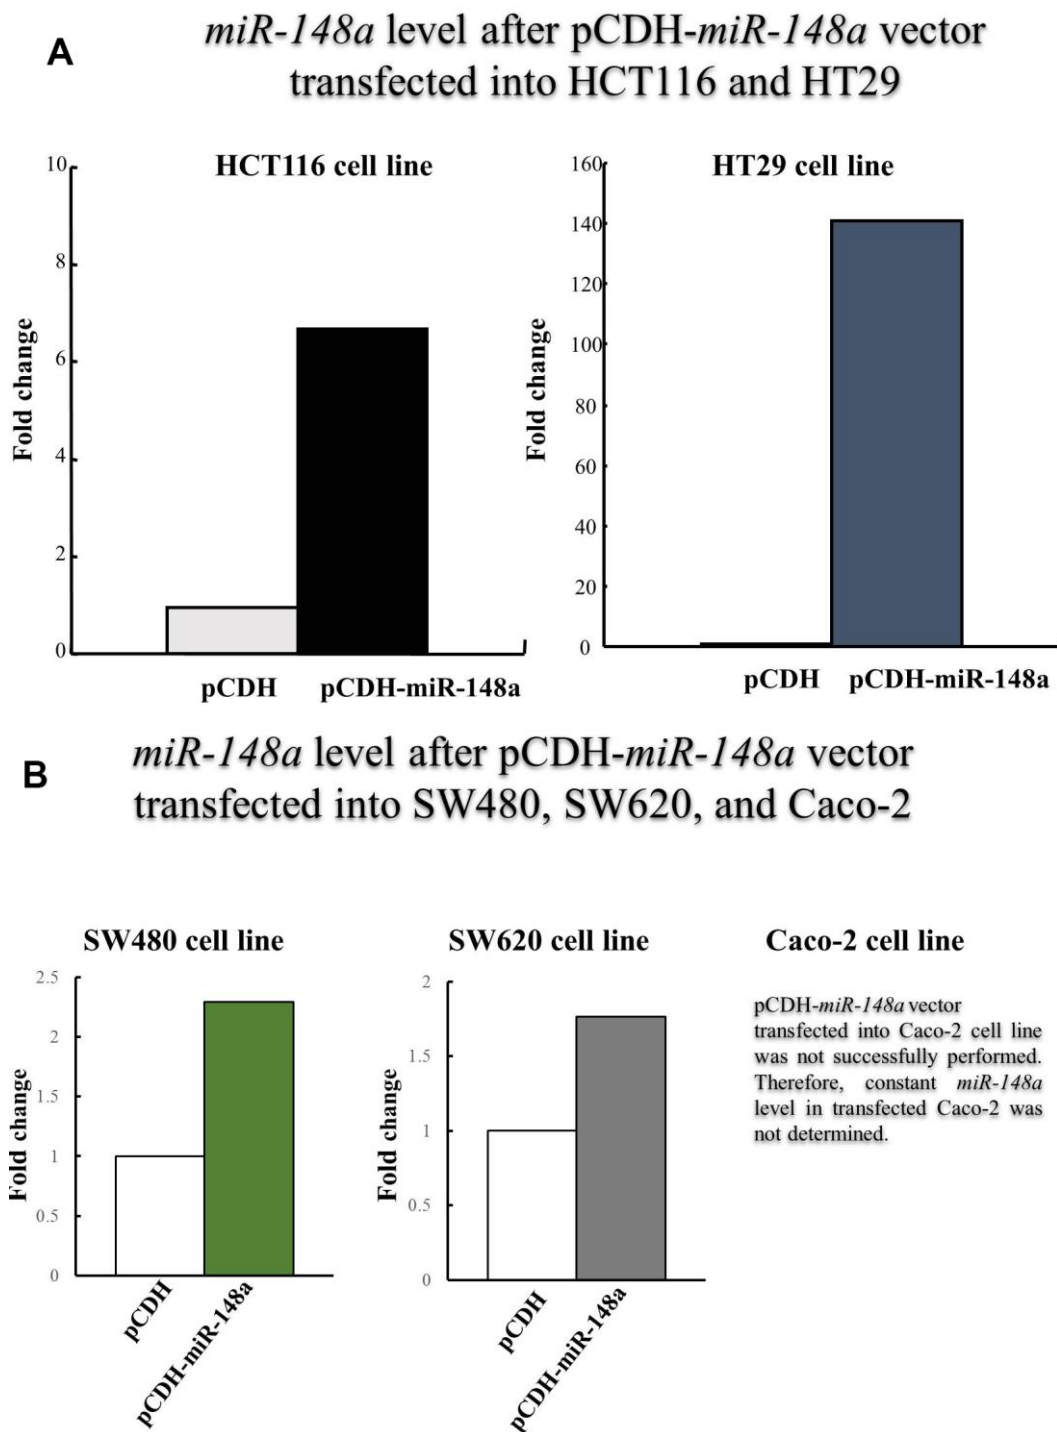

**Supplementary Figure 4.** *miR-148a* was transfected into five colon cancer cell lines. (A) *miR-148a* was successfully transfected into HCT116 (7-fold) and HT29 cells (140-fold). (B) Transfection of *miR-148a* into SW480 cells (2.3-fold) and SW620 cells (1.75-fold) was not significant, and transfection was not successful in Caco-2 cells.
